# Supplementary material for: Targeting Tumor Microenvironment: Effects of Chinese Herbal Formulae on Macrophage‐Mediated Lung Cancer in Mice
Source: Hindawi journal article supplement (doi:10.1155/2017/7187168), 2017-01-01
Supplement: f1 [file 7187168.f1.pdf]

## Supplementary data

**Table 1** The contents of the 8 bioactive compounds in Qingre Huoxue formula

| Compound Name              | No. | Concentration (mg/g) |
|----------------------------|-----|----------------------|
| Albiflorin                 | 1   | 1.56± 0.00           |
| Paeoniflorin               | 2   | 11.8 ± 0.0           |
| Baicalin                   | 3   | 36.2 ± 0.2           |
| Oroxylin A-7-O-glucuronide | 4   | 2.49± 0.03           |
| Wogonoside                 | 5   | 12.0 ± 0.1           |
| Baicalein                  | 6   | 6.36± 0.05           |
| Wogonin                    | 7   | 1.86± 0.02           |
| Oroxylin A                 | 8   | 0.606± 0.007         |

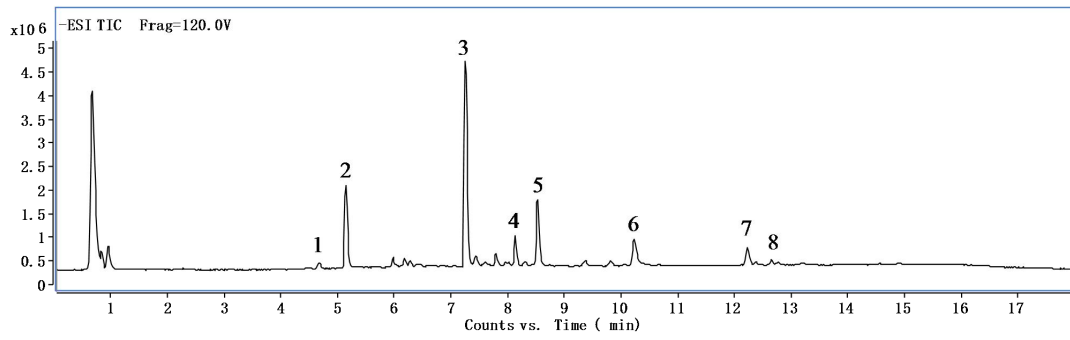

**Figure 1.**Total ion chromatography (A) of Qingre Huoxue formula by HPLC-Q/TOF MS
